# Supplementary material for: Design and Implementation of a Time-Restricted Feeding Intervention in a Randomized, Controlled Feeding Study
Source: Preprints.org preprint supplement (doi:10.20944/preprints202208.0388.v1), 2022-08-22
Supplement: Supplementary file 10 [file Table S5.docx]

**Table S5.** Average Percentage of Daily Calories by Meal in the Usual Feeding Pattern Arm

|  | **1600 kcal daily** | | | **2000 kcal daily** | | | **2500 kcal daily** | | | **3000 kcal daily** | | | **3500 kcal daily** | | |
| --- | --- | --- | --- | --- | --- | --- | --- | --- | --- | --- | --- | --- | --- | --- | --- |
| **Meal** | **Target** | **Average** | **SD** | **Target** | **Average** | **SD** | **Target** | **Average** | **SD** | **Target** | **Average** | **SD** | **Target** | **Average** | **SD** |
| Breakfast | 20 | 20.1 | 0.6 | 20 | 19.7 | 0.5 | 20 | 20.1 | 0.6 | 20 | 19.5 | 0.7 | 20 | 20.1 | 0.2 |
| Lunch | 25 | 24.9 | 0.3 | 25 | 25.6 | 1.5 | 25 | 25.0 | 0.6 | 25 | 25.3 | 0.4 | 25 | 25.0 | 0.2 |
| Dinner | 50 | 50.1 | 1.0 | 50 | 49.3 | 1.6 | 50 | 49.5 | 0.9 | 50 | 50.2 | 0.6 | 50 | 49.9 | 0.2 |
| Snack | 5 | 4.9 | 0.6 | 5 | 5.4 | 0.3 | 5 | 5.4 | 0.5 | 5 | 5.0 | 0.3 | 5 | 5.0 | 0.2 |

Abbreviations: SD, standard deviation

Note: All results are provided in %.
